# Supplementary material for: Identification of Genetic Loci Simultaneously Associated with Multiple Cardiometabolic Traits
Source: bioRxiv or medRxiv preprint supplement (doi:10.1101/2021.12.13.21267561), 2021-12-14

**Supplementary Table 1:** Sex-specific associations of four loci identified in sex-combined analysis.

|                  | <b>GRB14-COBL1</b><br>rs13389219: C/T |       |           | <b>KLF14</b><br>rs201632637: CTTTTT/C |       |           | <b>RGS19-OPRL1</b><br>rs8126001: C/T |       |          | <b>VEGFA-C6orf223</b><br>rs998584: C/A |       |           |
|------------------|---------------------------------------|-------|-----------|---------------------------------------|-------|-----------|--------------------------------------|-------|----------|----------------------------------------|-------|-----------|
|                  | beta                                  | se    | p         | beta                                  | se    | p         | beta                                 | se    | p        | beta                                   | se    | p         |
| <b>Women</b>     |                                       |       |           |                                       |       |           |                                      |       |          |                                        |       |           |
| TG (mmol/L)      | 0.049                                 | 0.003 | 7.40E-63  | 0.046                                 | 0.003 | 9.60E-58  | 0.02                                 | 0.003 | 4.80E-12 | -0.042                                 | 0.003 | 1.90E-48  |
| LDL-C (mmom/L)   | 0.026                                 | 0.003 | 1.10E-24  | 0.026                                 | 0.003 | 1.70E-25  | 0.019                                | 0.003 | 2.70E-13 | -0.024                                 | 0.003 | 1.10E-21  |
| HDL-C (mmol/L)   | -0.034                                | 0.003 | 1.50E-33  | -0.047                                | 0.003 | 1.00E-62  | -0.017                               | 0.003 | 2.70E-09 | 0.036                                  | 0.003 | 1.90E-38  |
| HbA1c (mmol/mol) | 0.016                                 | 0.003 | 6.50E-10  | 0.016                                 | 0.003 | 1.10E-09  | 0.012                                | 0.003 | 2.50E-06 | -0.026                                 | 0.003 | 1.50E-23  |
| SBP (mmHg)       | 0.02                                  | 0.003 | 6.00E-13  | 0.014                                 | 0.003 | 2.80E-07  | 0.019                                | 0.003 | 7.70E-12 | -0.012                                 | 0.003 | 2.10E-05  |
| DBP (mmHg)       | 0.02                                  | 0.003 | 1.20E-12  | 0.017                                 | 0.003 | 1.30E-10  | 0.015                                | 0.003 | 4.30E-08 | -0.016                                 | 0.003 | 5.80E-09  |
| WHRadjBMI        | 0.067                                 | 0.003 | 2.60E-132 | 0.034                                 | 0.003 | 3.90E-37  | 0.028                                | 0.003 | 4.80E-25 | -0.069                                 | 0.003 | 5.40E-145 |
| metacca-p        |                                       |       | 0.00E+00  |                                       |       | 5.10E-154 |                                      |       | 1.20E-45 |                                        |       | 0.00E+00  |
| <b>Men</b>       |                                       |       |           |                                       |       |           |                                      |       |          |                                        |       |           |
| TG (mmol/L)      | 0.026                                 | 0.004 | 1.40E-13  | 0.017                                 | 0.003 | 1.80E-06  | 0.012                                | 0.003 | 5.40E-04 | -0.041                                 | 0.003 | 3.40E-31  |
| LDL-C (mmom/L)   | 0.009                                 | 0.003 | 1.60E-03  | 0.008                                 | 0.003 | 4.80E-03  | 0.015                                | 0.003 | 7.10E-07 | -0.01                                  | 0.003 | 1.10E-03  |
| HDL-C (mmol/L)   | -0.029                                | 0.003 | 9.50E-21  | -0.019                                | 0.003 | 1.20E-09  | -0.008                               | 0.003 | 1.30E-02 | 0.04                                   | 0.003 | 3.30E-39  |
| HbA1c (mmol/mol) | 0.007                                 | 0.003 | 1.60E-02  | 0.004                                 | 0.003 | 1.90E-01  | 0.009                                | 0.003 | 1.90E-03 | -0.013                                 | 0.003 | 1.60E-05  |
| SBP (mmHg)       | 0.013                                 | 0.003 | 2.70E-05  | 0.015                                 | 0.003 | 7.40E-07  | 0.015                                | 0.003 | 3.50E-07 | -0.011                                 | 0.003 | 3.60E-04  |
| DBP (mmHg)       | 0.011                                 | 0.003 | 5.10E-04  | 0.015                                 | 0.003 | 1.00E-06  | 0.009                                | 0.003 | 2.10E-03 | -0.017                                 | 0.003 | 3.90E-08  |
| WHRadjBMI        | -0.008                                | 0.003 | 1.30E-02  | -0.006                                | 0.003 | 3.90E-02  | 0.003                                | 0.003 | 2.80E-01 | -0.03                                  | 0.003 | 1.90E-22  |
| metacca-p        |                                       |       | 1.40E-32  |                                       |       | 4.90E-18  |                                      |       | 3.70E-12 |                                        |       | 5.40E-79  |

**Supplementary Table 2:** Colocalization analyses at four top loci at PPFC>0.72 threshold

| Gene                | Trait                              | N.snps | Posterior prob. | Regional prob. | Candidate SNP         | Candidate SNP bp | allele1 | allele0 | Posterior explained by SNP |
|---------------------|------------------------------------|--------|-----------------|----------------|-----------------------|------------------|---------|---------|----------------------------|
| <i>KLF14</i>        | TG, LDL, HDL, HBA1C, DBP, WHR      | 2538   | 0.8869          | 0.9998         | 7:130438531_CTTTTTT_C | 130438531        | CTTTTT  | C       | 0.9987                     |
| <i>GRB14-COBBL1</i> | TG, LDL, HDL, HBA1C, SBP, DBP, WHR | 2888   | 0.9774          | 1              | rs13389219            | 165528876        | C       | T       | 0.9274                     |
| <i>RSG19-OPRL1</i>  | TG, LDL, HDL, HBA1C, SBP, WHR      | 3405   | 0.9937          | 1              | rs8126001             | 62711459         | C       | T       | 1                          |
| <i>VEGFA</i>        | TG, LDL, HDL, HBA1C, WHR           | 3575   | 0.998           | 1              | rs998584              | 43757896         | C       | A       | 1                          |

**Supplementary Table 3:** Associations of top four loci with T2D (DIAGRAM), CAD (CARDIOGRAM), and stroke (METASTROKE)

|             | <i>GRB14-COBL1</i><br>rs13389219:C/T |        |          | <i>KLF14</i><br>rs11765979:A/C |        |          | <i>RGS19-OPRL1</i><br>rs8126001: C/T |        |          | <i>VEGFA-C6orf223</i><br>rs998584: C/A |        |          |
|-------------|--------------------------------------|--------|----------|--------------------------------|--------|----------|--------------------------------------|--------|----------|----------------------------------------|--------|----------|
|             | beta                                 | se     | p        | beta                           | se     | p        | beta                                 | se     | p        | beta                                   | se     | p        |
| DIAGRAM     | 0.0800                               | 0.0076 | 8.60E-26 | 0.0580                         | 0.0075 | 9.40E-15 | 0.0360                               | 0.0076 | 2.30E-06 | -0.0550                                | 0.0075 | 2.20E-13 |
| CARDIOGRAM  | 0.0238                               | 0.0101 | 1.88E-02 | 0.0192                         | 0.0093 | 3.92E-02 | 0.0247                               | 0.0108 | 2.29E-02 | -0.0419                                | 0.0099 | 2.21E-05 |
| MEGASTROKE* | 0.014                                | 0.0094 | 0.1393   | 0.0146                         | 0.0109 | 0.1803   | 0.0139                               | 0.0111 | 0.2119   | -0.012                                 | 0.0098 | 0.2208   |

\*KLF14 used rs7271530: C/T

Supplementary Table 4: Phenome-wide association study of rs13389219 at COBL1

| Oxford Brain Imaging Genetics (BIG)                                                                         |          |          |
|-------------------------------------------------------------------------------------------------------------|----------|----------|
| rs13389219 (Nearest genes: GRB14, COBL1)                                                                    |          |          |
| Phenotype                                                                                                   | P-value  | Beta     |
| Trunk fat percentage                                                                                        | 3.00E-27 | 0.025    |
| Hip circumference                                                                                           | 1.10E-26 | 0.026    |
| Body fat percentage                                                                                         | 1.90E-24 | 0.019    |
| Arm fat percentage (left)                                                                                   | 5.20E-20 | 0.017    |
| Arm fat percentage (right)                                                                                  | 1.20E-19 | 0.017    |
| Trunk fat mass                                                                                              | 2.40E-18 | 0.022    |
| Leg fat percentage (right)                                                                                  | 1.20E-16 | 0.013    |
| Impedance of arm (left)                                                                                     | 4.60E-16 | 0.014    |
| Impedance of arm (right)                                                                                    | 2.10E-15 | 0.014    |
| Whole body fat mass                                                                                         | 3.80E-15 | 0.019    |
| Waist-to-hip ratio adjusted for smoking                                                                     | 1.10E-14 | 0.029    |
| Leg fat percentage (left)                                                                                   | 1.20E-14 | 0.012    |
| Leg fat mass (right)                                                                                        | 1.30E-12 | 0.014    |
| Arm fat mass (right)                                                                                        | 7.90E-12 | 0.017    |
| Waist-to-hip ratio adjusted for BMI                                                                         | 8.50E-12 | 0.029    |
| Leg fat mass (left)                                                                                         | 1.00E-11 | 0.013    |
| Arm fat mass (left)                                                                                         | 6.80E-11 | 0.016    |
| Diabetes diagnosed by doctor                                                                                | 1.90E-10 | -0.0034  |
| Impedance of whole body                                                                                     | 2.80E-10 | 0.012    |
| Treatment/medication code: metformin                                                                        | 1.50E-07 | -0.002   |
| Non-cancer illness code, self-reported: diabetes                                                            | 4.60E-07 | -0.0024  |
| Weight                                                                                                      | 7.20E-07 | 0.011    |
| Illnesses of siblings: Diabetes                                                                             | 1.30E-06 | -0.0037  |
| Body mass index (BMI)                                                                                       | 2.20E-06 | 0.012    |
| Illnesses of mother: Diabetes                                                                               | 2.60E-06 | -0.0035  |
| Non-cancer illness code, self-reported: type 2 diabetes                                                     | 1.20E-05 | -0.00087 |
| Medication for cholesterol, blood pressure, diabetes, or take exogenous hormones: Blood pressure medication | 2.60E-05 | -0.0054  |
| Non-cancer illness code, self-reported: hypertension                                                        | 4.60E-05 | -0.0044  |
| Treatment/medication code: latanoprost                                                                      | 4.80E-05 | -0.00046 |
| Vascular/heart problems diagnosed by doctor: High blood pressure                                            | 5.20E-05 | -0.0045  |
| Alcohol intake frequency                                                                                    | 7.20E-05 | -0.014   |
| Medication for cholesterol, blood pressure, diabetes, or take exogenous hormones: None of the above         | 1.80E-04 | 0.0059   |
| Vascular/heart problems diagnosed by doctor: None of the above                                              | 2.40E-04 | 0.0042   |
| Treatment/medication code: zimovane 1s 3.75mg tablet                                                        | 3.70E-04 | -0.00016 |
| Nap during day                                                                                              | 4.10E-04 | -0.0052  |
| Waist circumference adjusted for smoking                                                                    | 4.10E-04 | 0.013    |
| Systolic blood pressure, automated reading                                                                  | 4.40E-04 | -0.0089  |
| Illnesses of father: Diabetes                                                                               | 5.60E-04 | -0.0027  |
| Total cholesterol in HDL                                                                                    | 6.60E-04 | 0.036    |
| Bipolar disorder status                                                                                     | 6.80E-04 | -0.079   |
| Trunk fat-free mass                                                                                         | 6.80E-04 | -0.0053  |
| Concentration of small VLDL particles                                                                       | 7.20E-04 | -0.037   |
| Trunk predicted mass                                                                                        | 7.50E-04 | -0.0053  |
| Hand grip strength (left)                                                                                   | 7.90E-04 | -0.006   |
| Phospholipids in small VLDL                                                                                 | 7.90E-04 | -0.035   |
| Triglycerides in small VLDL                                                                                 | 8.00E-04 | -0.035   |
| Alcohol intake versus 10 years previously                                                                   | 9.70E-04 | -0.0062  |
| Number of full sisters                                                                                      | 1.00E-03 | -0.0063  |
| Total lipids in small VLDL                                                                                  | 1.00E-03 | -0.036   |
| NETMAT amplitudes (100) 43                                                                                  | 1.30E-03 | -0.046   |

| Open Target Genetics                                                                     |             |              |
|------------------------------------------------------------------------------------------|-------------|--------------|
| rs13389219 (Nearest gene: GRB14, COBL1)                                                  |             |              |
| Trait                                                                                    | P-value     | Beta         |
| Hip circumference                                                                        | 1.69638E-31 | 0.257151     |
| Trunk fat percentage                                                                     | 9.8901E-28  | 0.190711     |
| Body fat percentage                                                                      | 8.45631E-26 | 0.160632     |
| Arm fat percentage (left)                                                                | 2.59868E-23 | 0.181244     |
| Arm fat percentage (right)                                                               | 3.16422E-23 | 0.179295     |
| Trunk fat mass                                                                           | 1.51378E-22 | 0.121835     |
| Whole body fat mass                                                                      | 1.92523E-20 | 0.207272     |
| High light scatter reticulocyte count                                                    | 2.54578E-20 | -0.000232181 |
| Leg fat percentage (right)                                                               | 1.468E-18   | 0.117006     |
| Leg fat mass (right)                                                                     | 2.72291E-16 | 0.031053     |
| Leg fat percentage (left)                                                                | 3.98294E-16 | 0.102969     |
| Arm fat mass (right)                                                                     | 1.17982E-15 | 0.0119239    |
| Arm fat mass (left)                                                                      | 1.65881E-15 | 0.0132548    |
| Impedance of arm (left)                                                                  | 1.73805E-15 | 0.753797     |
| Triglycerides                                                                            | 2.598E-15   | -0.0271      |
| Impedance of arm (right)                                                                 | 2.66753E-15 | 0.729642     |
| Leg fat mass (left)                                                                      | 2.70077E-15 | 0.02923      |
| Reticulocyte count                                                                       | 1.36134E-14 | -0.000739579 |
| Diabetes mellitus                                                                        | 3.36E-14    | -0.0834      |
| Reticulocyte count                                                                       | 6.503E-14   | -0.02749336  |
| Type 2 diabetes                                                                          | 3.8E-13     | -0.0826      |
| Reticulocyte percentage                                                                  | 9.38069E-12 | -0.0152436   |
| High light scatter reticulocyte count                                                    | 1.113E-11   | -0.02485962  |
| Reticulocyte fraction of red cells                                                       | 1.145E-11   | -0.02487405  |
| Diabetes diagnosed by doctor                                                             | 2.18626E-11 | -0.075061017 |
| Haemoglobin concentration                                                                | 3.08655E-11 | -0.0158461   |
| Red blood cell (erythrocyte) count                                                       | 1.34624E-10 | -0.0054783   |
| Impedance of whole body                                                                  | 1.37837E-10 | 1.03526      |
| High light scatter reticulocyte percentage of red cells                                  | 4.43E-10    | -0.02283534  |
| Body mass index (bmi)                                                                    | 2.43204E-09 | 0.0680645    |
| Body mass index (bmi)                                                                    | 3.51935E-09 | 0.0676235    |
| High light scatter reticulocyte percentage                                               | 3.91605E-09 | -0.00491419  |
| Weight                                                                                   | 2.88166E-08 | 0.188401     |
| Weight                                                                                   | 3.35496E-08 | 0.188249     |
| Metformin   treatment/medication code                                                    | 6.3622E-08  | -0.083430798 |
| Mean spheroid cell volume                                                                | 9.66984E-08 | 0.0688302    |
| LDL cholesterol                                                                          | 9.894E-08   | -0.022       |
| Diabetes   illnesses of siblings                                                         | 1.23286E-07 | -0.051000667 |
| Diabetes   non-cancer illness code, self-reported                                        | 1.33489E-07 | -0.065155238 |
| Haematocrit percentage                                                                   | 1.47043E-07 | -0.0369737   |
| Essential hypertension                                                                   | 0.000000238 | -0.0339      |
| Hemoglobin concentration                                                                 | 2.642E-07   | -0.01863582  |
| Hypertension                                                                             | 0.000000313 | -0.0335      |
| Type 2 diabetes                                                                          | 0.00000079  | -0.076961041 |
| Cholesterol, total                                                                       | 0.000001335 | -0.0199      |
| Mean reticulocyte volume                                                                 | 1.46612E-06 | 0.0918663    |
| Lymphocyte percentage                                                                    | 0.000003237 | -0.0824311   |
| Diabetes   illnesses of mother                                                           | 3.2768E-06  | -0.03976024  |
| Alcohol intake frequency                                                                 | 3.97088E-06 | -0.0162193   |
| Blood pressure medication   medication for cholesterol, blood pressure, diabetes, or tak | 4.7987E-06  | -0.038441701 |

Supplementary Table 5: Phenome-wide association study of rs7633256 at *KLF14*

| Oxford Brain Imaging Genetics (BIG)                                                                               |          |          |
|-------------------------------------------------------------------------------------------------------------------|----------|----------|
| rs201632637 (proxy used: rs7633256, R2 = 0.94, Ref = CEU) (Nearest gene: KLF14)                                   |          |          |
| Phenotype                                                                                                         | P-value  | Beta     |
| Hip circumference                                                                                                 | 1.90E-16 | 0.02     |
| Trunk fat percentage                                                                                              | 6.00E-14 | 0.017    |
| Medication for cholesterol, blood pressure, diabetes, or take exogenous hormones: Blood pressure medication       | 1.50E-13 | -0.0094  |
| Body fat percentage                                                                                               | 1.90E-13 | 0.014    |
| Medication for cholesterol, blood pressure, diabetes, or take exogenous hormones: Cholesterol lowering medication | 7.10E-11 | -0.0073  |
| Non-cancer illness code, self-reported: hypertension                                                              | 9.10E-11 | -0.007   |
| Vascular/heart problems diagnosed by doctor: High blood pressure                                                  | 1.30E-10 | -0.007   |
| Arm fat percentage (left)                                                                                         | 1.50E-10 | 0.012    |
| Vascular/heart problems diagnosed by doctor: None of the above                                                    | 2.60E-10 | 0.0071   |
| Arm fat percentage (right)                                                                                        | 6.60E-10 | 0.012    |
| Leg fat percentage (right)                                                                                        | 7.80E-10 | 0.0096   |
| Impedance of arm (right)                                                                                          | 8.10E-10 | 0.011    |
| Impedance of arm (left)                                                                                           | 8.70E-10 | 0.011    |
| Trunk fat mass                                                                                                    | 1.10E-09 | 0.015    |
| Leg fat percentage (left)                                                                                         | 5.30E-09 | 0.009    |
| Medication for cholesterol, blood pressure, diabetes, or take exogenous hormones: None of the above               | 6.00E-08 | 0.0085   |
| Whole body fat mass                                                                                               | 1.30E-07 | 0.013    |
| Impedance of whole body                                                                                           | 2.90E-07 | 0.0096   |
| Diabetes diagnosed by doctor                                                                                      | 8.80E-07 | -0.0026  |
| Treatment/medication code: simvastatin                                                                            | 3.80E-06 | -0.0036  |
| Arm fat mass (left)                                                                                               | 8.20E-06 | 0.011    |
| Leg fat mass (right)                                                                                              | 1.40E-05 | 0.0085   |
| Arm fat mass (right)                                                                                              | 2.00E-05 | 0.01     |
| Non-cancer illness code, self-reported: high cholesterol                                                          | 2.00E-05 | -0.0034  |
| Leg fat mass (left)                                                                                               | 2.20E-05 | 0.0082   |
| Treatment/medication code: metformin                                                                              | 2.20E-05 | -0.0016  |
| Treatment/medication code: lisinopril                                                                             | 2.30E-05 | -0.0017  |
| Illnesses of mother: Diabetes                                                                                     | 3.00E-05 | -0.0031  |
| Systolic blood pressure, automated reading                                                                        | 5.20E-05 | -0.01    |
| Non-cancer illness code, self-reported: diabetes                                                                  | 7.80E-05 | -0.0019  |
| Comparative height size at age 10                                                                                 | 1.10E-04 | 0.0065   |
| Age when periods started (menarche)                                                                               | 1.50E-04 | -0.0095  |
| FreeSurfer a2009s rh S occipital ant thickness                                                                    | 2.10E-04 | -0.055   |
| FreeSurfer DKTatlas rh parsorbitalis area                                                                         | 2.50E-04 | -0.048   |
| Diagnoses - main ICD10: Z41 Procedures for purposes other than remedying health state                             | 3.00E-04 | 0.00032  |
| Treatment/medication code: atenolol                                                                               | 5.40E-04 | -0.0017  |
| FreeSurfer volume Left-Hippocampus                                                                                | 5.70E-04 | -0.042   |
| Treatment/medication code: sotalol                                                                                | 6.70E-04 | -0.0034  |
| Waist circumference                                                                                               | 7.00E-04 | 0.0074   |
| Treatment/medication code: otomize ear spray                                                                      | 7.10E-04 | -0.00019 |
| Diastolic blood pressure, automated reading                                                                       | 7.90E-04 | -0.0084  |
| Non-cancer illness code, self-reported: cystitis                                                                  | 9.60E-04 | -0.00023 |
| Body mass index (BMI)                                                                                             | 1.00E-03 | 0.008    |
| T1 FAST ROIs L hippocampus                                                                                        | 1.30E-03 | -0.039   |
| FreeSurfer a2009s rh S circular insula ant area                                                                   | 1.40E-03 | -0.045   |
| Weight                                                                                                            | 1.40E-03 | 0.0069   |
| FreeSurfer volume Right-Hippocampus                                                                               | 1.60E-03 | -0.039   |
| Non-cancer illness code, self-reported: urticaria                                                                 | 1.60E-03 | -0.00019 |
| Triglycerides in small VLDL                                                                                       | 1.60E-03 | -0.036   |
| Treatment/medication code: minims artificial tears single-use eye drops                                           | 1.70E-03 | -0.00011 |

| Open Target Genetics                                                                                                                                |             |              |
|-----------------------------------------------------------------------------------------------------------------------------------------------------|-------------|--------------|
| rs201632637 (proxy used: rs7633256, R2 = 0.94, Ref = CEU) (Nearest gene: KLF14)                                                                     |             |              |
| Trait                                                                                                                                               | P-value     | Beta         |
| Hip circumference                                                                                                                                   | 1.1114E-23  | 0.218279     |
| Trunk fat percentage                                                                                                                                | 1.17149E-15 | 0.138282     |
| Body fat percentage                                                                                                                                 | 3.41403E-15 | 0.119041     |
| Trunk fat mass                                                                                                                                      | 1.37821E-13 | 0.0911783    |
| Arm fat percentage (right)                                                                                                                          | 1.63832E-13 | 0.131641     |
| Arm fat percentage (left)                                                                                                                           | 1.72479E-13 | 0.132689     |
| Blood pressure medication   medication for cholesterol, blood pressure, diabetes, or take exogenous hormones: Blood pressure medication             | 2.56015E-13 | -0.060737312 |
| Cholesterol lowering medication   medication for cholesterol, blood pressure, diabetes, or take exogenous hormones: Cholesterol lowering medication | 5.14072E-12 | -0.065557865 |
| Whole body fat mass                                                                                                                                 | 1.46556E-11 | 0.149246     |
| Hypertension   non-cancer illness code, self-reported                                                                                               | 2.67973E-11 | -0.035159319 |
| High blood pressure   vascular/heart problems diagnosed by doctor                                                                                   | 5.76962E-11 | -0.034227222 |
| Leg fat percentage (right)                                                                                                                          | 9.70148E-11 | 0.0851131    |
| None of the above   vascular/heart problems diagnosed by doctor                                                                                     | 1.21042E-10 | 0.032365939  |
| Leg fat percentage (left)                                                                                                                           | 3.82497E-10 | 0.0782785    |
| Ankle spacing width                                                                                                                                 | 3.92828E-10 | -0.0778254   |
| Impedance of arm (right)                                                                                                                            | 8.03923E-10 | 0.560406     |
| Arm fat mass (left)                                                                                                                                 | 1.11134E-09 | 0.100205     |
| Arm fat mass (right)                                                                                                                                | 1.87423E-09 | 0.00884281   |
| Impedance of arm (left)                                                                                                                             | 2.19311E-09 | 0.56         |
| Leg fat mass (right)                                                                                                                                | 4.83026E-08 | 0.0204372    |
| None of the above   medication for cholesterol, blood pressure, diabetes, or take exogenous hormones: None of the above                             | 9.98317E-08 | 0.036743182  |
| Leg fat mass (left)                                                                                                                                 | 1.06501E-07 | 0.0194257    |
| Simvastatin   treatment/medication code                                                                                                             | 3.86373E-07 | -0.036973125 |
| Impedance of whole body                                                                                                                             | 5.0655E-07  | 0.800828     |
| Mean platelet (thrombocyte) volume                                                                                                                  | 5.54865E-07 | 0.0130192    |
| Waist circumference                                                                                                                                 | 1.23602E-06 | 0.137289     |
| Diabetes diagnosed by doctor                                                                                                                        | 1.41716E-06 | -0.053431076 |
| High cholesterol   non-cancer illness code, self-reported                                                                                           | 1.50076E-06 | -0.034160174 |
| Body mass index (bmi)                                                                                                                               | 2.7714E-06  | 0.0528337    |
| Body mass index (bmi)                                                                                                                               | 3.15436E-06 | 0.0527417    |
| Mean spheroid cell volume                                                                                                                           | 3.64165E-06 | 0.0590453    |
| High light scatter reticulo-cyte count                                                                                                              | 9.18807E-06 | -0.000110448 |
| Metformin   treatment/medication code                                                                                                               | 1.98172E-05 | -0.065028318 |
| Type 2 diabetes                                                                                                                                     | 0.00002027  | -0.0673      |
| Lisinopril   treatment/medication code                                                                                                              | 2.15872E-05 | -0.061456933 |
| Weight                                                                                                                                              | 3.76943E-05 | 0.138848     |
| Weight                                                                                                                                              | 3.91857E-05 | 0.137957     |
| Essential hypertension                                                                                                                              | 0.0000422   | -0.0266      |
| Diabetes   illnesses of mother                                                                                                                      | 5.21121E-05 | -0.034121237 |
| Hypertension                                                                                                                                        | 5.83E-05    | -0.026       |
| Diabetes mellitus                                                                                                                                   | 0.0000878   | -0.0427      |
| Mean platelet volume                                                                                                                                | 0.00009192  | 0.01433537   |
| Comparative height size at age 10                                                                                                                   | 9.85883E-05 | 0.00631378   |
| Age when periods started (menarche)                                                                                                                 | 0.000105668 | -0.0093532   |
| Reticulocyte count                                                                                                                                  | 0.0001362   | -0.0138985   |
| Type 2 diabetes                                                                                                                                     | 0.000139    | -0.0429      |
| Diabetes   non-cancer illness code, self-reported                                                                                                   | 0.000146696 | -0.046336892 |
| Reticulocyte fraction of red cells                                                                                                                  | 0.0002526   | -0.01332348  |
| Atenolol   treatment/medication code                                                                                                                | 0.000409211 | -0.043292271 |
| Ulceration of intestine                                                                                                                             | 0.00043     | -0.195       |

**Supplementary Table 6:** Phenome-wide association study of rs8126001 at *RGS19-OPRL1*

| Oxford Brain Imaging Genetics (BIG)                                                                               |          |         |
|-------------------------------------------------------------------------------------------------------------------|----------|---------|
| rs8126001 (Nearest gene: RGS19, OPRL1)                                                                            |          |         |
| Phenotype                                                                                                         | P-value  | Beta    |
| Non-cancer illness code, self-reported: high cholesterol                                                          | 5.20E-12 | -0.0055 |
| Vascular/heart problems diagnosed by doctor: None of the above                                                    | 2.50E-11 | 0.0074  |
| Medication for cholesterol, blood pressure or diabetes: None of the above                                         | 3.00E-10 | 0.011   |
| Medication for cholesterol, blood pressure or diabetes: Cholesterol lowering medication                           | 6.50E-10 | -0.0094 |
| Systolic blood pressure, automated reading                                                                        | 3.70E-09 | -0.015  |
| Vascular/heart problems diagnosed by doctor: High blood pressure                                                  | 8.90E-09 | -0.0062 |
| Treatment/medication code: simvastatin                                                                            | 3.00E-08 | -0.0043 |
| Medication for cholesterol, blood pressure, diabetes, or take exogenous hormones: Cholesterol lowering medication | 3.20E-08 | -0.0061 |
| Non-cancer illness code, self-reported: hypertension                                                              | 4.00E-08 | -0.0059 |
| Impedance of whole body                                                                                           | 1.90E-07 | -0.0097 |
| Number of self-reported non-cancer illnesses                                                                      | 1.20E-06 | -0.0098 |
| Impedance of arm (left)                                                                                           | 3.30E-06 | -0.008  |
| Treatment/medication code: ramipril                                                                               | 6.00E-06 | -0.0023 |
| Treatment/medication code: aspirin                                                                                | 6.70E-06 | -0.0037 |
| Birth weight of first child                                                                                       | 7.40E-06 | 0.02    |
| Diagnoses - main ICD10: I25 Chronic ischaemic heart disease                                                       | 8.00E-06 | -0.0017 |
| dMRI TBSS ISOVF Superior corona radiata R                                                                         | 8.10E-06 | 0.056   |
| Impedance of arm (right)                                                                                          | 9.60E-06 | -0.0076 |
| Medication for pain relief, constipation, heartburn: Aspirin                                                      | 1.10E-05 | -0.0037 |
| Illnesses of father: Heart disease                                                                                | 1.10E-05 | -0.0054 |
| Impedance of leg (left)                                                                                           | 1.30E-05 | -0.0097 |
| Vascular/heart problems diagnosed by doctor: Angina                                                               | 2.80E-05 | -0.0018 |
| Impedance of leg (right)                                                                                          | 3.70E-05 | -0.0091 |
| Non-cancer illness code, self-reported: angina                                                                    | 4.30E-05 | -0.0017 |
| dMRI ProtrackX L1 s1f1                                                                                            | 6.60E-05 | 0.055   |
| Medication for cholesterol, blood pressure, diabetes, or take exogenous hormones: Blood pressure medication       | 7.80E-05 | -0.005  |
| Hip circumference                                                                                                 | 8.10E-05 | 0.0095  |
| dMRI TBSS ISOVF Superior corona radiata L                                                                         | 9.10E-05 | 0.051   |
| dMRI ProtrackX ISOVF str l                                                                                        | 9.20E-05 | 0.049   |
| Medication for cholesterol, blood pressure or diabetes: Blood pressure medication                                 | 9.30E-05 | -0.0061 |
| Medication for cholesterol, blood pressure, diabetes, or take exogenous hormones: None of the above               | 1.10E-04 | 0.006   |
| Illnesses of mother: Diabetes                                                                                     | 1.10E-04 | -0.0028 |
| dMRI TBSS ISOVF Posterior thalamic radiation L                                                                    | 1.40E-04 | 0.059   |
| Forced expiratory volume in 1-second (FEV1), predicted percentage                                                 | 1.40E-04 | 0.016   |
| Forced expiratory volume in 1-second (FEV1)                                                                       | 1.50E-04 | 0.0079  |
| Had other major operations                                                                                        | 1.70E-04 | 0.0059  |
| Forced vital capacity (FVC)                                                                                       | 1.80E-04 | 0.0074  |
| Underlying (primary) cause of death: ICD10: C85.9 Non-Hodgkin's lymphoma, unspecified type                        | 1.80E-04 | -0.0058 |
| Treatment/medication code: atorvastatin                                                                           | 2.00E-04 | -0.0016 |
| dMRI ProtrackX ISOVF s1f r                                                                                        | 2.30E-04 | 0.049   |
| dMRI ProtrackX MD s1f1                                                                                            | 3.20E-04 | 0.053   |
| dMRI ProtrackX MD s1f r                                                                                           | 3.20E-04 | 0.051   |
| dMRI ProtrackX L1 s1f r                                                                                           | 3.50E-04 | 0.047   |
| dMRI ProtrackX L2 s1f r                                                                                           | 3.70E-04 | 0.052   |
| Treatment/medication code: lisinopril                                                                             | 3.90E-04 | -0.0014 |
| dMRI ProtrackX ISOVF str r                                                                                        | 4.30E-04 | 0.042   |
| Diabetes diagnosed by doctor                                                                                      | 4.60E-04 | -0.0018 |
| Bring up phlegm/sputum/mucus on most days                                                                         | 5.70E-04 | 0.0047  |
| dMRI TBSS MD Superior longitudinal fasciculus R                                                                   | 5.90E-04 | 0.049   |
| FreeSurfer volume Left-Amygdala                                                                                   | 6.20E-04 | -0.042  |

| Open Target Genetics                                                                        |             |              |
|---------------------------------------------------------------------------------------------|-------------|--------------|
| rs8126001 (Nearest gene: RGS19, OPRL1)                                                      |             |              |
| Trait                                                                                       | P-value     | Beta         |
| High cholesterol   non-cancer illness code, self-reported                                   | 2.98385E-12 | -0.049164855 |
| None of the above   vascular/heart problems diagnosed by doctor                             | 1.63892E-11 | 0.033599967  |
| Mean spheroid cell volume                                                                   | 1.29303E-10 | 0.0813431    |
| Mean corpuscular volume                                                                     | 1.82902E-10 | 0.0664817    |
| None of the above   medication for cholesterol, blood pressure or diabetes                  | 1.02225E-09 | 0.042516541  |
| Cholesterol lowering medication   medication for cholesterol, blood pressure or diabetes    | 1.4284E-09  | -0.047845461 |
| Cholesterol lowering medication   medication for cholesterol, blood pressure, diabetes, or  | 2.7783E-09  | -0.056111864 |
| High blood pressure   vascular/heart problems diagnosed by doctor                           | 4.8856E-09  | -0.030339626 |
| Mean corpuscular volume                                                                     | 7.872E-09   | 0.02044855   |
| Hypertension   non-cancer illness code, self-reported                                       | 1.83693E-08 | -0.029460906 |
| Simvastatin   treatment/medication code                                                     | 4.66822E-08 | -0.039491362 |
| Impedance of whole body                                                                     | 5.06793E-08 | -0.861666    |
| Mean corpuscular haemoglobin                                                                | 5.70243E-07 | 0.0217278    |
| Ulcerative colitis                                                                          | 7.042E-07   | 0.0824       |
| Mean corpuscular hemoglobin                                                                 | 8.628E-07   | 0.01748823   |
| Ramipril   treatment/medication code                                                        | 1.52901E-06 | -0.05328843  |
| Aspirin   treatment/medication code                                                         | 1.72768E-06 | -0.032217619 |
| Angina   vascular/heart problems diagnosed by doctor                                        | 1.89807E-06 | -0.063614196 |
| Impedance of leg (right)                                                                    | 2.45843E-06 | -0.361301    |
| Impedance of leg (left)                                                                     | 2.59847E-06 | -0.359993    |
| Angina   non-cancer illness code, self-reported                                             | 3.36189E-06 | -0.062053629 |
| Impedance of arm (left)                                                                     | 4.34686E-06 | -0.426591    |
| Aspirin   medication for pain relief, constipation, heartburn                               | 4.67975E-06 | -0.030208392 |
| Heart disease   illnesses of father                                                         | 4.86502E-06 | -0.024433554 |
| Number of self-reported non-cancer illnesses                                                | 5.39996E-06 | -0.00859202  |
| Coronary artery disease                                                                     | 0.00006469  | -0.0267      |
| Impedance of arm (right)                                                                    | 7.80188E-06 | -0.404516    |
| Mean reticulocyte volume                                                                    | 8.93096E-06 | 0.0830717    |
| Birth weight of first child                                                                 | 1.41029E-05 | 0.0121927    |
| Coronary atherosclerosis                                                                    | 0.0000156   | -0.0474      |
| Breast cancer                                                                               | 0.00001752  | 0.0281       |
| Hot drink temperature                                                                       | 3.85072E-05 | -0.00554822  |
| Blood pressure medication   medication for cholesterol, blood pressure, diabetes, or take e | 4.06689E-05 | -0.033858793 |
| Atorvastatin   treatment/medication code                                                    | 4.96798E-05 | -0.055829483 |
| Diabetes   illnesses of mother                                                              | 5.04982E-05 | -0.033915878 |
| None of the above   medication for cholesterol, blood pressure, diabetes, or take exogeno   | 6.11986E-05 | 0.02747412   |
| Hip circumference                                                                           | 7.29664E-05 | 0.0856447    |
| Hyperlipidemia                                                                              | 7.51E-05    | -0.0331      |
| Coronary artery disease                                                                     | 0.000076    | -0.027644    |
| Disorders of lipid metabolism                                                               | 0.0000831   | -0.0329      |
| Inflammatory bowel disease                                                                  | 0.0001192   | 0.0503       |
| Diabetes diagnosed by doctor                                                                | 0.000136592 | -0.041935756 |
| Forced expiratory volume in 1-second (fev1)                                                 | 0.000172968 | 0.00532793   |
| Blood pressure medication   medication for cholesterol, blood pressure or diabetes          | 0.000173131 | -0.02906805  |
| Place of birth in uk - north co-ordinate                                                    | 0.000204542 | 1063.93      |
| Eosinophil count                                                                            | 0.000206532 | -0.00654894  |
| Forced vital capacity (fvc)                                                                 | 0.000242762 | 0.00675107   |
| Had other major operations                                                                  | 0.000278608 | 0.024880034  |
| Getting up in morning                                                                       | 0.000292617 | 0.00643989   |
| Breast disorder nos                                                                         | 0.000318    | 0.358        |

Supplementary Table 7: Phenome-wide association study of rs998584 at *VEGFA*

| Oxford Brain Imaging Genetics (BIG)                                                                               |          |         |
|-------------------------------------------------------------------------------------------------------------------|----------|---------|
| rs998584 (Nearest gene: <i>VEGFA</i> )                                                                            |          |         |
| Phenotype                                                                                                         | P-value  | Beta    |
| Waist-to-hip ratio adjusted for BMI                                                                               | 1.50E-18 | -0.037  |
| Hip circumference                                                                                                 | 2.00E-18 | -0.021  |
| Waist circumference adjusted for BMI                                                                              | 2.90E-14 | -0.031  |
| Arm fat percentage (left)                                                                                         | 7.30E-09 | -0.011  |
| Arm fat percentage (right)                                                                                        | 8.70E-09 | -0.011  |
| Non-cancer illness code, self-reported: high cholesterol                                                          | 3.50E-08 | 0.0044  |
| Impedance of leg (left)                                                                                           | 1.50E-07 | 0.012   |
| Trunk fat percentage                                                                                              | 1.50E-07 | -0.012  |
| Arm fat mass (right)                                                                                              | 2.70E-07 | -0.012  |
| Impedance of leg (right)                                                                                          | 3.20E-07 | 0.011   |
| Arm fat mass (left)                                                                                               | 3.20E-07 | -0.012  |
| Treatment/medication code: metformin                                                                              | 6.90E-07 | 0.0019  |
| Trunk fat mass                                                                                                    | 8.80E-07 | -0.012  |
| Vascular/heart problems diagnosed by doctor: None of the above                                                    | 1.30E-06 | -0.0054 |
| Leg predicted mass (left)                                                                                         | 2.70E-06 | -0.0075 |
| Leg fat-free mass (left)                                                                                          | 2.90E-06 | -0.0075 |
| Treatment/medication code: simvastatin                                                                            | 3.10E-06 | 0.0036  |
| Vascular/heart problems diagnosed by doctor: High blood pressure                                                  | 3.70E-06 | 0.005   |
| Body mass index (BMI)                                                                                             | 4.30E-06 | -0.011  |
| Body fat percentage                                                                                               | 5.00E-06 | -0.0085 |
| Whole body fat mass                                                                                               | 5.10E-06 | -0.011  |
| Medication for cholesterol, blood pressure, diabetes, or take exogenous hormones: None of the above               | 5.60E-06 | -0.007  |
| Concentration of large HDL particles                                                                              | 7.60E-06 | -0.049  |
| Total lipids in large HDL                                                                                         | 8.20E-06 | -0.049  |
| Phospholipids in large HDL                                                                                        | 9.10E-06 | -0.049  |
| Non-cancer illness code, self-reported: hypertension                                                              | 9.20E-06 | 0.0047  |
| Weight                                                                                                            | 1.20E-05 | -0.0093 |
| Leg fat-free mass (right)                                                                                         | 1.20E-05 | -0.007  |
| Leg predicted mass (right)                                                                                        | 1.30E-05 | -0.0069 |
| Total cholesterol in large HDL                                                                                    | 1.30E-05 | -0.048  |
| Cholesterol esters in large HDL                                                                                   | 1.50E-05 | -0.048  |
| Diabetes diagnosed by doctor                                                                                      | 1.80E-05 | 0.0022  |
| Medication for cholesterol, blood pressure, diabetes, or take exogenous hormones: Cholesterol lowering medication | 1.80E-05 | 0.0048  |
| Cholesterol esters in large VLDL                                                                                  | 1.80E-05 | 0.048   |
| Medication for cholesterol, blood pressure or diabetes: None of the above                                         | 2.50E-05 | -0.0072 |
| Free cholesterol in large HDL                                                                                     | 2.50E-05 | -0.046  |
| Waist circumference                                                                                               | 3.90E-05 | 0.0089  |
| Hair/balding pattern: Pattern 4                                                                                   | 4.40E-05 | 0.0057  |
| Pulse rate, automated reading                                                                                     | 5.30E-05 | 0.01    |
| Triglycerides in small VLDL                                                                                       | 5.60E-05 | 0.044   |
| Triglycerides in medium VLDL                                                                                      | 5.80E-05 | 0.044   |
| Illnesses of mother: Diabetes                                                                                     | 7.30E-05 | 0.0029  |
| Medication for cholesterol, blood pressure or diabetes: Cholesterol lowering medication                           | 8.20E-05 | 0.006   |
| Total lipids in large VLDL                                                                                        | 8.30E-05 | 0.043   |
| Triglycerides in large VLDL                                                                                       | 8.40E-05 | 0.043   |
| Phospholipids in medium VLDL                                                                                      | 9.90E-05 | 0.043   |
| Leg fat mass (right)                                                                                              | 1.10E-04 | -0.0075 |
| Free cholesterol in medium VLDL                                                                                   | 1.30E-04 | 0.042   |
| Medication for cholesterol, blood pressure or diabetes: Blood pressure medication                                 | 1.40E-04 | 0.0059  |
| Total lipids in medium VLDL                                                                                       | 1.40E-04 | 0.042   |

| Open Target Genetics                                                         |             |              |
|------------------------------------------------------------------------------|-------------|--------------|
| rs998584 (Nearest gene: <i>VEGFA</i> )                                       |             |              |
| Trait                                                                        | P-value     | Beta         |
| Hip circumference                                                            | 7.03663E-19 | -0.191518    |
| Ankle spacing width                                                          | 5.75557E-16 | -0.0997339   |
| Triglycerides                                                                | 3.424E-15   | 0.0293       |
| Reticulocyte count                                                           | 2.524E-13   | 0.0263027    |
| High light scatter reticulocyte count                                        | 6.235E-13   | 0.02581551   |
| Red blood cell (erythrocyte) count                                           | 1.26146E-12 | 0.00593366   |
| Mean spheroid cell volume                                                    | 1.38565E-12 | -0.0896141   |
| Haemoglobin concentration                                                    | 6.69302E-12 | 0.0160456    |
| Arm fat percentage (left)                                                    | 2.25342E-11 | -0.119418    |
| Arm fat percentage (right)                                                   | 7.44547E-11 | -0.115231    |
| High light scatter reticulocyte percentage of red cells                      | 9.871E-11   | 0.02320853   |
| Reticulocyte fraction of red cells                                           | 1.086E-10   | 0.02318643   |
| Impedance of leg (left)                                                      | 2.10582E-10 | 0.486331     |
| Heel bone mineral density                                                    | 2.4E-10     | 0.0129599    |
| Impedance of leg (right)                                                     | 2.45209E-10 | 0.485132     |
| Platelet distribution width                                                  | 3.46028E-10 | 0.0077039    |
| High cholesterol   non-cancer illness code, self-reported                    | 8.991E-10   | 0.043143918  |
| Coronary artery disease                                                      | 1.214E-09   | 0.038        |
| White blood cell count                                                       | 6.616E-09   | 0.02080482   |
| Trunk fat percentage                                                         | 6.69347E-09 | -0.0992862   |
| Trunk fat mass                                                               | 6.85967E-09 | -0.0708034   |
| High light scatter reticulocyte count                                        | 7.09405E-09 | 0.000142595  |
| Myeloid white cell count                                                     | 7.175E-09   | 0.02084357   |
| Ankle spacing width (right)                                                  | 9.97228E-09 | -0.0951295   |
| Hemoglobin concentration                                                     | 1.06E-08    | 0.0203067    |
| Sum neutrophil eosinophil counts                                             | 1.18E-08    | 0.02045818   |
| Neutrophil count                                                             | 1.248E-08   | 0.02040576   |
| Sum basophil neutrophil counts                                               | 1.361E-08   | 0.02038575   |
| Granulocyte count                                                            | 1.371E-08   | 0.02039211   |
| Coronary artery disease                                                      | 0.000000025 | 0.0390679    |
| Leg predicted mass (left)                                                    | 2.61136E-08 | -0.0149742   |
| Leg fat-free mass (left)                                                     | 3.27513E-08 | -0.0158563   |
| Haematocrit percentage                                                       | 5.09843E-08 | 0.0375507    |
| Leg fat-free mass (right)                                                    | 6.98652E-08 | -0.0154354   |
| Leg predicted mass (right)                                                   | 8.15378E-08 | -0.0143983   |
| Body mass index (bmi)                                                        | 8.66478E-08 | -0.0598367   |
| Arm fat mass (left)                                                          | 1.15251E-07 | -0.00864417  |
| Weight                                                                       | 1.16889E-07 | -0.176273    |
| Whole body fat mass                                                          | 1.43751E-07 | -0.1153      |
| Arm fat mass (right)                                                         | 1.46107E-07 | -0.00767191  |
| Body fat percentage                                                          | 1.8643E-07  | -0.0781267   |
| Cholesterol lowering medication   medication for cholesterol, blood pressure | 3.61553E-07 | 0.047993285  |
| None of the above   vascular/heart problems diagnosed by doctor              | 5.48669E-07 | -0.024974663 |
| Type 2 diabetes                                                              | 0.000000703 | 0.0553       |
| None of the above   medication for cholesterol, blood pressure, diabetes, or | 7.56822E-07 | -0.033876507 |
| Hematocrit                                                                   | 9.018E-07   | 0.0173552    |
| Body mass index (bmi)                                                        | 9.9616E-07  | -0.0548938   |
| Metformin   treatment/medication code                                        | 1.4943E-06  | 0.072737761  |
| Simvastatin   treatment/medication code                                      | 1.60006E-06 | 0.034668979  |
| Hypertension                                                                 | 0.00000182  | 0.0306       |

**Supplementary Figure 1:** Phenotypic (A) and genetic (B) correlations among the seven traits in the UK Biobank.

**A.**

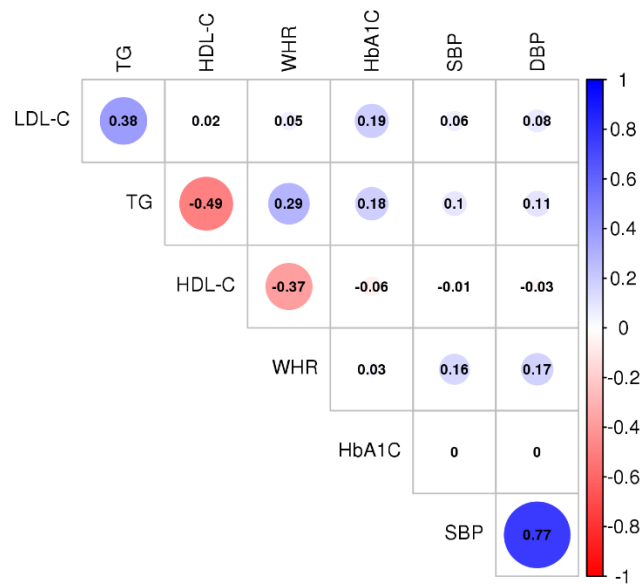

**B.**

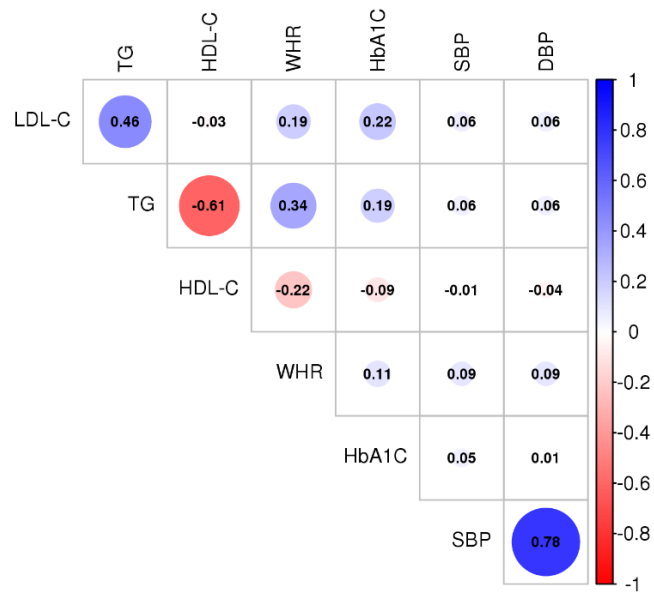

Supplement: Supplementary file [file media-1.pdf]
